# Supplementary material for: The Alteration of the Gut Microbiome during Ramadan Offers a Novel Perspective on Ramadan Fasting: A Pilot Study
Source: MDPI journal article supplement (doi:10.3390/microorganisms11082106), 2023-08-18
Supplement: s1 [file s1]

**Supplementary Table S1.** Physical measurement of participants.

| Sample | Age | Gender | Height (cm) | Weight (kg) | BMI (kg/m <sup>2</sup> ) | Meal time (min) |
|--------|-----|--------|-------------|-------------|--------------------------|-----------------|
| S1     | 28  | Male   | 165.5       | 71          | 25.9                     | 35±5            |
| S2     | 27  | Male   | 164.4       | 61          | 22.6                     | 18.75±6.5       |
| S3     | 27  | Male   | 187         | 74          | 21.2                     | 30±9.35         |
| S4     | 27  | Male   | 160         | 57          | 22.3                     | 25±9.35         |
| S5     | 28  | Male   | 164         | 68          | 25.3                     | 22.5±5.59       |
| S6     | 32  | Male   | 161.4       | 70          | 26.9                     | 26.25±4.15      |
| S7     | 32  | Male   | 164         | 65          | 24.2                     | 27.5±9.01       |
| S9     | 28  | Male   | 166         | 63          | 22.9                     | 20±3.54         |
| S10    | 27  | Male   | 182         | 70          | 21.1                     | 28.75±7.4       |
| S10    | 27  | Male   | 180         | 80          | 24.7                     | 21.25±5.45      |
| S11    | 26  | Male   | 169         | 71          | 24.9                     | 22.5±10.9       |
| S12    | 27  | Male   | 158.4       | 52          | 20.7                     | 25±3.54         |
| S13    | 32  | Male   | 165.3       | 80          | 29.3                     | 21.25±5.45      |
| S14    | 29  | Male   | 165         | 60          | 22                       | 38.75±6.5       |
| S15    | 35  | Male   | 158.2       | 67          | 26.8                     | 30±10.61        |
| S16    | 29  | Male   | 159.3       | 65          | 25.6                     | 26.25±7.4       |
| S17    | 33  | Male   | 170         | 92          | 31.8                     | 22.5±5.59       |
| S18    | 35  | Male   | 166         | 67          | 24.3                     | 26.25±2.165     |
| S19    | 26  | Male   | 165         | 69          | 25.3                     | 23.75±4.15      |
| S20    | 27  | Male   | 176         | 86          | 27.8                     | 21.25±4.15      |

**Supplementary Table S2.** Information of diet survey during Ramadan.

| Food name              | barely eaten | 1 week back |     | 2 week back |     |     | base quantity          | intake/meal |      |      |     |
|------------------------|--------------|-------------|-----|-------------|-----|-----|------------------------|-------------|------|------|-----|
|                        |              | 1           | 2~3 | 1           | 2~4 | 5~6 |                        | ① ½         | ② 1  | ③ 1½ | ④ 2 |
| 1. Mutton Karahi       | ①            | ②           | ③   | ④           | ⑤   | ⑥   | 1 cup (cooked)         | ① ½         | ② 1  | ③ 1½ | ④ 2 |
| 2. Roti                | ①            | ②           | ③   | ④           | ⑤   | ⑥   | 9inch diameter generic | ① ½         | ② 2  | ③ 1½ | ④ 2 |
| 3. paratha             | ①            | ②           | ③   | ④           | ⑤   | ⑥   | 1 prata = 80g          | ① ½         | ② 3  | ③ 1½ | ④ 2 |
| 4. Chicken Biryani     | ①            | ②           | ③   | ④           | ⑤   | ⑥   | 1 cup (cooked)         | ① ½         | ② 4  | ③ 1½ | ④ 2 |
| 5. Mutton Qeema        | ①            | ②           | ③   | ④           | ⑤   | ⑥   | 1 cup (cooked, 161g)   | ① ½         | ② 5  | ③ 1½ | ④ 2 |
| 6. Chicken Korma       | ①            | ②           | ③   | ④           | ⑤   | ⑥   | 1 cup (125gm)          | ① ½         | ② 6  | ③ 1½ | ④ 2 |
| 7. Eggplant curry      | ①            | ②           | ③   | ④           | ⑤   | ⑥   | 1 cup (200gm)          | ① ½         | ② 7  | ③ 1½ | ④ 2 |
| 8. Milkshake           | ①            | ②           | ③   | ④           | ⑤   | ⑥   | 1 glass (250mL)        | ① ½         | ② 8  | ③ 1½ | ④ 2 |
| 9. Chai (Tea)          | ①            | ②           | ③   | ④           | ⑤   | ⑥   | 1 cup (100mL)          | ① ½         | ② 9  | ③ 1½ | ④ 2 |
| 10. Green Tea          | ①            | ②           | ③   | ④           | ⑤   | ⑥   | 1 cup (100mL)          | ① ½         | ② 10 | ③ 1½ | ④ 2 |
| 11. Fruit salad        | ①            | ②           | ③   | ④           | ⑤   | ⑥   | 1 cup (240gm)          | ① ½         | ② 11 | ③ 1½ | ④ 2 |
| 12. Channad Chaat      | ①            | ②           | ③   | ④           | ⑤   | ⑥   | 1 cup (300gm)          | ① ½         | ② 12 | ③ 1½ | ④ 2 |
| 13. Cauliflower curry  | ①            | ②           | ③   | ④           | ⑤   | ⑥   | 1 cup (250gm)          | ① ½         | ② 13 | ③ 1½ | ④ 2 |
| 14. Seekh kabab        | ①            | ②           | ③   | ④           | ⑤   | ⑥   | 1=100g, 2 per plate    | ① ½         | ② 14 | ③ 1½ | ④ 2 |
| 15. yougart            | ①            | ②           | ③   | ④           | ⑤   | ⑥   | 1 cup (150gm)          | ① ½         | ② 15 | ③ 1½ | ④ 2 |
| 16. Sweet Lassi        | ①            | ②           | ③   | ④           | ⑤   | ⑥   | 1 glass (150mL)        | ① ½         | ② 16 | ③ 1½ | ④ 2 |
| 17. Vegetable          | ①            | ②           | ③   | ④           | ⑤   | ⑥   | 1 cup (100gm)          | ① ½         | ② 17 | ③ 1½ | ④ 2 |
| 18. Fried Beans        | ①            | ②           | ③   | ④           | ⑤   | ⑥   | 1 cup (100gm)          | ① ½         | ② 18 | ③ 1½ | ④ 2 |
| 19. Onion potato curry | ①            | ②           | ③   | ④           | ⑤   | ⑥   | 1 cup (100gm)          | ① ½         | ② 19 | ③ 1½ | ④ 2 |
| 20. Okro (Lady Finger) | ①            | ②           | ③   | ④           | ⑤   | ⑥   | 1 cup (100gm)          | ① ½         | ② 20 | ③ 1½ | ④ 2 |
| 21. Cucumber           | ①            | ②           | ③   | ④           | ⑤   | ⑥   | 1 medium (99gm)        | ① ½         | ② 21 | ③ 1½ | ④ 2 |
| 22. Eba                | ①            | ②           | ③   | ④           | ⑤   | ⑥   | 1 cup (cooked, 100gm)  | ① ½         | ② 22 | ③ 1½ | ④ 2 |
| 23. Amala              | ①            | ②           | ③   | ④           | ⑤   | ⑥   | 1 cup (80gm)           | ① ½         | ② 23 | ③ 1½ | ④ 2 |
| 24. Jollof rice        | ①            | ②           | ③   | ④           | ⑤   | ⑥   | 1 cup (50gm)           | ① ½         | ② 24 | ③ 1½ | ④ 2 |
| 25. Semo               | ①            | ②           | ③   | ④           | ⑤   | ⑥   | 1 cup (100gm)          | ① ½         | ② 25 | ③ 1½ | ④ 2 |
| 26. Bread              | ①            | ②           | ③   | ④           | ⑤   | ⑥   | 1 bread (60gm)         | ① ½         | ② 26 | ③ 1½ | ④ 2 |

**Supplementary Table S3.** Dietary information during Ramadan.

| <b>Foods (1 serve)</b>    | <b>Carbohydrate (g)</b> | <b>Fat (g)</b> | <b>Protein (g)</b> | <b>Calories (kcal)</b> |
|---------------------------|-------------------------|----------------|--------------------|------------------------|
| Mutton Karahi (240 g)     | 0                       | 21             | 25                 | 294                    |
| Roti (4bakje)             | 15                      | 5              | 2                  | 122                    |
| Paratha (1piece)          | 35                      | 14             | 5                  | 280                    |
| Chicken Biryani (1 bowl)  | 60                      | 9              | 14                 | 395                    |
| Mutton Qeema (0.5.cup)    | 9                       | 28             | 16                 | 359                    |
| Chicken Korma (1 dish)    | 17                      | 19             | 28                 | 340                    |
| Eggplant curry (1cup)     | 18                      | 0              | 0                  | 200                    |
| Milkshake (200ml)         | 25                      | 3              | 11                 | 180                    |
| Chai tea (1 cup)          | 9                       | 2              | 1                  | 60                     |
| Green tea (1 oz)          | 12                      | 0              | 0                  | 50                     |
| Fruit salad (1 container) | 12                      | 0              | 0                  | 55                     |
| Channad Chaat (1bowl)     | 26                      | 1              | 6                  | 150                    |
| Cauliflower curry (398g)  | 45                      | 24             | 26                 | 475                    |
| Seekh kebab (1kg)         | 4                       | 3              | 24                 | 147                    |
| Yogart (4 oz)             | 19                      | 5              | 0                  | 55                     |
| Sweet lassi (1cup)        | 57                      | 4              | 5                  | 280                    |
| Vegetables (1portion)     | 11                      | 1              | 2                  | 60                     |
| Fried beans (3 oz)        | 18                      | 5              | 6                  | 145                    |
| Onion potato curry (100g) | 20                      | 2              | 2                  | 100                    |
| Okro (Lady finger) (150g) | 23                      | 9              | 5                  | 180                    |
| Cucumber                  | 6                       | 0              | 2                  | 34                     |
| Eba (80g)                 | 64                      | 1              | 6                  | 285                    |
| Amala (100g)              | 33                      | 9              | 19                 | 287                    |
| Jollof rice (236.1)       | 51                      | 5              | 6                  | 240                    |
| Semo (1 cup)              | 75                      | 1              | 11                 | 600                    |
| Bread (1 slice)           | 15                      | 2              | 2                  | 80                     |

**Supplementary Table S4.** Caloric information of proteins, fats, carbohydrates and total per each sample.

| Sample | Time | proteins (kcal) | fats (kcal) | carbohydrates (kcal) | total (kcal) |
|--------|------|-----------------|-------------|----------------------|--------------|
| S1     | R1   | 334             | 355         | 223                  | 912          |
| S2     | R1   | 714             | 491         | 299                  | 1503         |
| S3     | R1   | 342             | 366         | 542                  | 1250         |
| S4     | R1   | 509             | 212         | 182                  | 902          |
| S5     | R1   | 701             | 247         | 322                  | 1269         |
| S6     | R1   | 815             | 312         | 324                  | 1451         |
| S7     | R1   | 1261            | 876         | 669                  | 2806         |
| S8     | R1   | 859             | 561         | 459                  | 1879         |
| S9     | R1   | 1048            | 602         | 506                  | 2155         |
| S10    | R1   | 791             | 467         | 340                  | 1599         |
| S11    | R1   | 915             | 629         | 492                  | 2036         |
| S12    | R1   | 169             | 71          | 53                   | 293          |
| S13    | R1   | 108             | 153         | 241                  | 502          |
| S14    | R1   | 527             | 256         | 247                  | 1030         |
| S15    | R1   | 987             | 521         | 280                  | 1788         |
| S16    | R1   | 965             | 525         | 273                  | 1763         |
| S17    | R1   | 1025            | 374         | 338                  | 1738         |
| S18    | R1   | 1221            | 721         | 542                  | 2485         |
| S19    | R1   | 987             | 521         | 280                  | 1788         |
| S20    | R1   | 987             | 521         | 280                  | 1788         |
| S1     | R2   | 964             | 382         | 104                  | 1450         |
| S2     | R2   | 779             | 477         | 216                  | 1472         |
| S3     | R2   | 2434            | 632         | 122                  | 3188         |
| S4     | R2   | 1262            | 442         | 211                  | 1916         |
| S5     | R2   | 1641            | 485         | 175                  | 2301         |
| S6     | R2   | 1720            | 295         | 262                  | 2277         |
| S7     | R2   | 1533            | 316         | 207                  | 2056         |
| S8     | R2   | 999             | 212         | 156                  | 1367         |
| S9     | R2   | 1945            | 382         | 332                  | 2658         |
| S10    | R2   | 1126            | 386         | 176                  | 1688         |
| S11    | R2   | 1240            | 321         | 238                  | 1799         |
| S12    | R2   | 812             | 368         | 280                  | 1460         |
| S13    | R2   | 1915            | 163         | 144                  | 2222         |
| S14    | R2   | 1651            | 258         | 184                  | 2094         |
| S15    | R2   | 1433            | 236         | 233                  | 1902         |
| S16    | R2   | 1754            | 520         | 229                  | 2502         |

|       |     |      |      |     |      |
|-------|-----|------|------|-----|------|
| S17   | R2  | 955  | 350  | 130 | 1435 |
| S18   | R2  | 2386 | 568  | 217 | 3171 |
| S19   | R2  | 621  | 318  | 190 | 1129 |
| S20   | R2  | 883  | 462  | 124 | 1469 |
| <hr/> |     |      |      |     |      |
| S1    | R4  | 1403 | 561  | 483 | 2447 |
| S2    | R4  | 665  | 506  | 331 | 1502 |
| S3    | R4  | 1103 | 632  | 323 | 2057 |
| S4    | R4  | 757  | 725  | 577 | 2059 |
| S5    | R4  | 880  | 489  | 316 | 1685 |
| S6    | R4  | 762  | 646  | 417 | 1825 |
| S7    | R4  | 607  | 476  | 375 | 1457 |
| S8    | R4  | 733  | 586  | 588 | 1907 |
| S9    | R4  | 658  | 404  | 229 | 1291 |
| S10   | R4  | 833  | 575  | 488 | 1897 |
| S11   | R4  | 880  | 374  | 390 | 1644 |
| S12   | R4  | 739  | 433  | 394 | 1565 |
| S13   | R4  | 1017 | 502  | 336 | 1855 |
| S14   | R4  | 507  | 253  | 207 | 967  |
| S15   | R4  | 664  | 376  | 357 | 1397 |
| S16   | R4  | 456  | 505  | 269 | 1231 |
| S17   | R4  | 921  | 1206 | 711 | 2839 |
| S18   | R4  | 970  | 733  | 526 | 2229 |
| S19   | R4  | 606  | 245  | 217 | 1068 |
| S20   | R4  | 435  | 422  | 262 | 1120 |
| <hr/> |     |      |      |     |      |
| S1    | PR4 | 1242 | 549  | 447 | 2237 |
| S2    | PR4 | 625  | 579  | 334 | 1538 |
| S3    | PR4 | 939  | 540  | 330 | 1808 |
| S4    | PR4 | 771  | 669  | 557 | 1997 |
| S5    | PR4 | 884  | 474  | 309 | 1667 |
| S6    | PR4 | 924  | 679  | 496 | 2098 |
| S7    | PR4 | 1090 | 1010 | 568 | 2669 |
| S8    | PR4 | 930  | 744  | 676 | 2350 |
| S9    | PR4 | 1261 | 992  | 551 | 2804 |
| S10   | PR4 | 1074 | 873  | 696 | 2642 |
| S11   | PR4 | 1153 | 813  | 522 | 2487 |
| S12   | PR4 | 859  | 512  | 442 | 1813 |
| S13   | PR4 | 1267 | 733  | 639 | 2639 |
| S14   | PR4 | 1156 | 912  | 525 | 2593 |
| S15   | PR4 | 1082 | 697  | 527 | 2306 |

|     |     |      |     |     |      |
|-----|-----|------|-----|-----|------|
| S16 | PR4 | 1058 | 767 | 508 | 2333 |
| S17 | PR4 | 941  | 933 | 596 | 2469 |
| S18 | PR4 | 1259 | 903 | 793 | 2954 |
| S19 | PR4 | 621  | 289 | 325 | 1235 |
| S20 | PR4 | 342  | 316 | 207 | 864  |

---

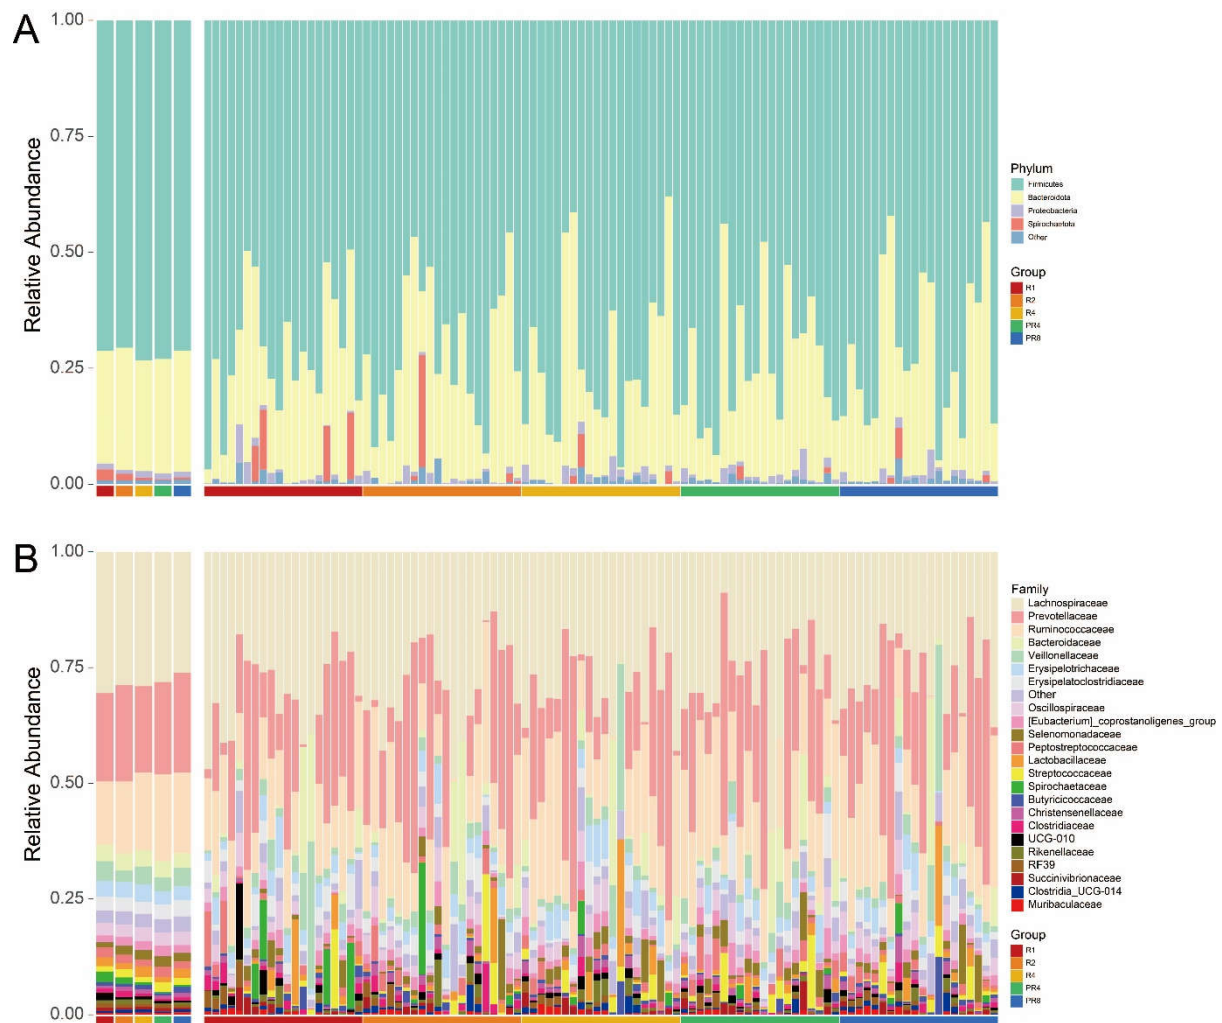

**Supplementary Figure S1.** Taxonomic classifications of individual. **(A)** Phylum level **(B)** Class level. Left of Both **(A)** and **(B)** show the microbial composition by group.
